# Supplementary material for: Regulation of the adsorption sites of Ni2P by Ru and S co-doping for ultra-efficient alkaline hydrogen evolution
Source: Royal Society of Chemistry journal article supplement (doi:10.1039/d1ta04231a), 2021-01-01
Supplement: d1ta04231a1.pdf [file d1ta04231a1.pdf]

## Supporting Information

### **Regulation of the Adsorption Site of Ni<sub>2</sub>P by Ru and S Co-doping for Ultra-efficient Alkaline Hydrogen Evolution**

Xiaodeng Wang<sup>a,b,c</sup>, Qi Hu<sup>a</sup>, Guodong Li<sup>a</sup>, Shaomin Wei<sup>a</sup>, Hengpan Yang<sup>a</sup>, Chuanxin  
He<sup>a,\*</sup>

<sup>a</sup> College of Chemistry and Environmental Engineering, Shenzhen University, Shenzhen, 518060, China

<sup>b</sup> Key Laboratory of Optoelectronic Devices and Systems of Ministry of Education and Guangdong Province, College of Optoelectronic Engineering, Shenzhen University, Shenzhen, 518060, China

<sup>c</sup> Department of Chemistry and Environmental Engineering, Hanshan Normal University, Qiaodong, Chaozhou, China

## ECSA and TOF

The electrochemical active surface area (ECSA) was estimated using the capacitance (C<sub>dl</sub>) by the following equation, where the specific capacitance for a flat surface is used as 40 μF cm<sup>-2</sup> as reported.

$$A_{ECSA}^{NiP2} = \frac{C_{dl}}{40 \mu F cm^{-2} per cm^2}$$

To calculate the per-site turnover frequency (TOF), we used the following formula:

$$TOF = \frac{\#total\ hydrogen\ turn\ overs / cm^2\ geometric\ area}{\#surface\ sites / cm^2\ geometric\ area}$$

The total number of hydrogen turn overs was calculated from the current density according to :

$$\begin{aligned} \#_{H_2} &= (j\ cm^2) \left( \frac{1\ C\ s^{-1}}{1000\ mA} \right) \left( \frac{1\ mol\ e^{-}}{96485.3\ C} \right) \left( \frac{1\ mol\ H_2}{2\ mol\ e^{-}} \right) \left( \frac{6.022 \times 10^{23}\ H_2\ molecules}{1\ mol\ H_2} \right) \\ &= 3.12 \times 10^{15} \frac{H_2/s}{cm^2} per \frac{mA}{cm^2} \times |j| \end{aligned}$$

#surface sites per real surface area:

For Ni<sub>2</sub>P

$$\begin{aligned} \#surface\ sites &= \left( \frac{3\ atoms/unit}{100.0397\ \text{\AA}^3/unit} \right)^{\frac{2}{3}} \\ &= 0.9654 \times 10^{14} atoms\ cm^{-2} \end{aligned}$$

Finally, plot of current density can be converted into a TOF plot according to

$$TOF = \frac{3.12 \times 10^{15} \frac{H_2/s}{cm^2} per \frac{mA}{cm^2} \times |j|}{\#surface\ sites \times A_{ECSA}^{NiP2}}$$

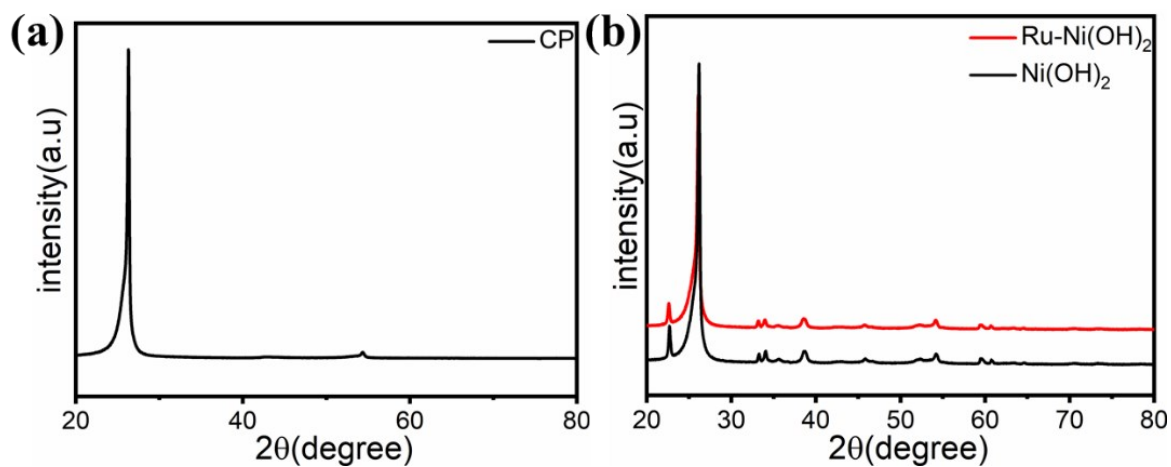

Figure S1 XRD patterns for (a) CP and (b) Ru-Ni(OH)<sub>2</sub> and Ni(OH)<sub>2</sub>.

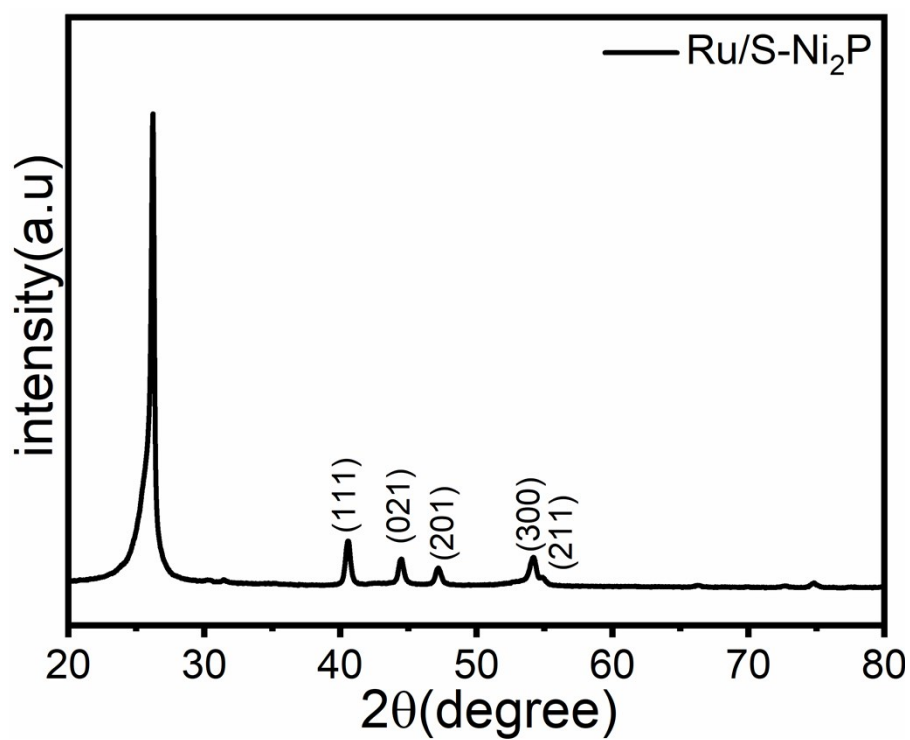

Figure S2 XRD for Ru/S-Ni<sub>2</sub>P.

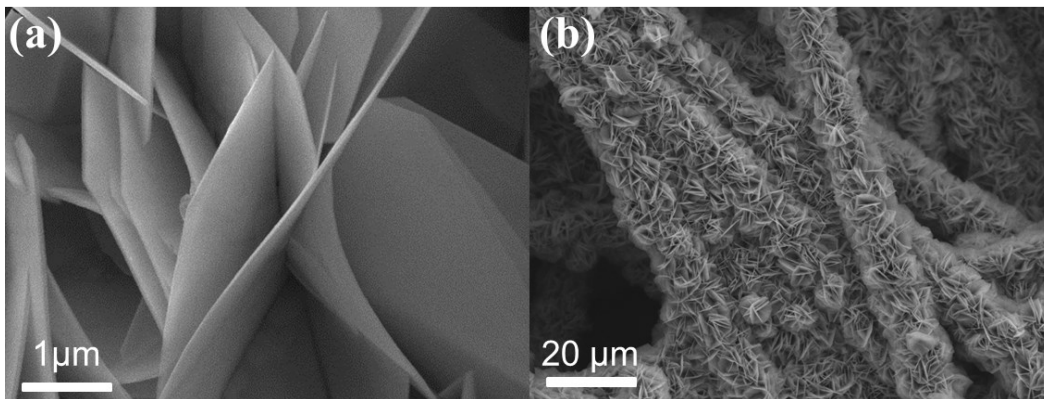

**Figure S3** SEM images for (a) Ni(OH)<sub>2</sub> and Large-scale SEM images for (b) Ni(OH)<sub>2</sub>.

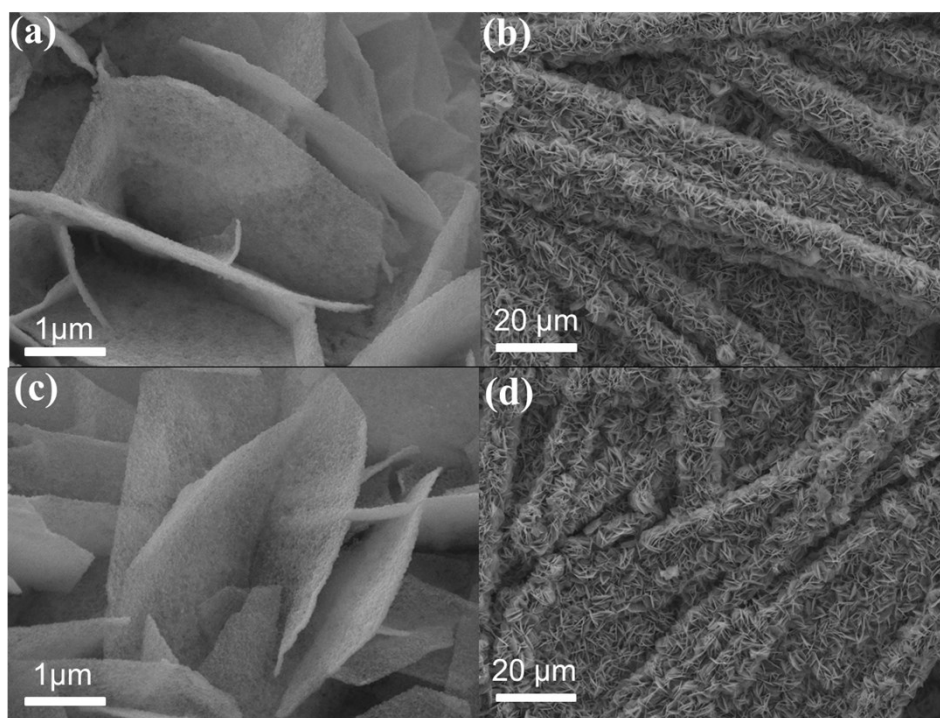

**Figure S4** SEM images for (a) Ni<sub>2</sub>P, (c) S-Ni<sub>2</sub>P. Large-scale SEM images for (b) Ni<sub>2</sub>P and (d) S-Ni<sub>2</sub>P.

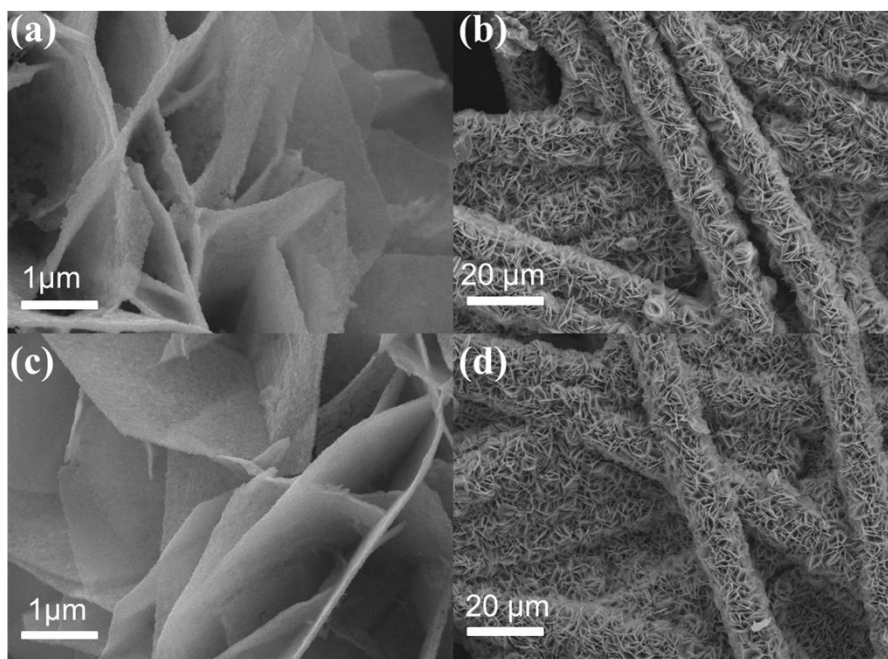

**Figure S5** SEM images for (a) Ru-Ni<sub>2</sub>P, (c) Ru/S-Ni<sub>2</sub>P. Large-scale SEM images for (b) Ru-Ni<sub>2</sub>P and (d) Ru/S-Ni<sub>2</sub>P.

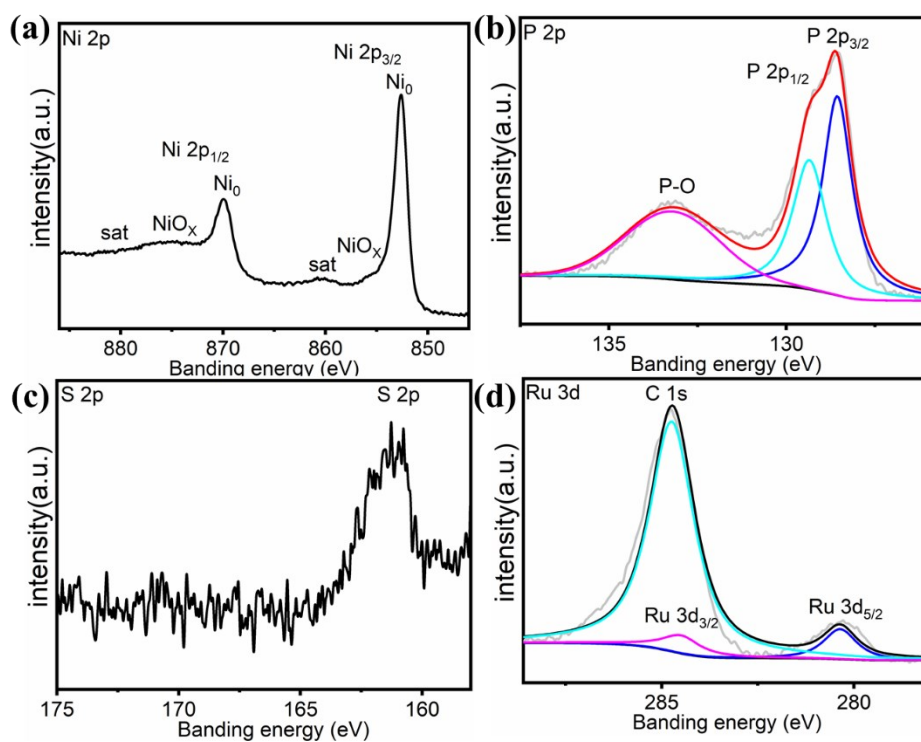

**Figure S6** XPS spectra of (a) Ni 2p, (b) P 2p, (c) S 2p and (d) Ru 3d regions for Ru/S-Ni<sub>2</sub>P.

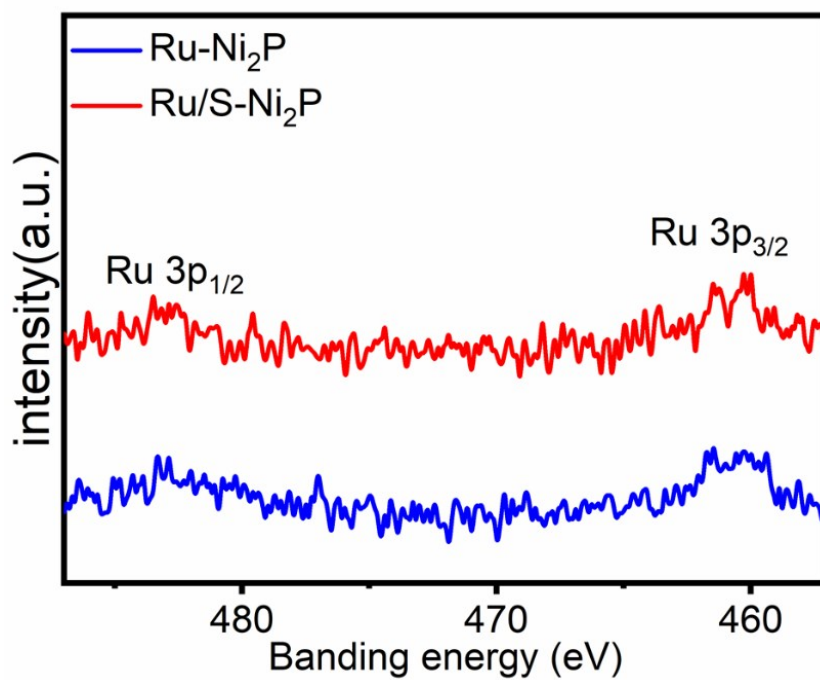

**Figure S7** XPS spectra of Ru 3p regions for Ru-Ni<sub>2</sub>P and Ru/S-Ni<sub>2</sub>P.

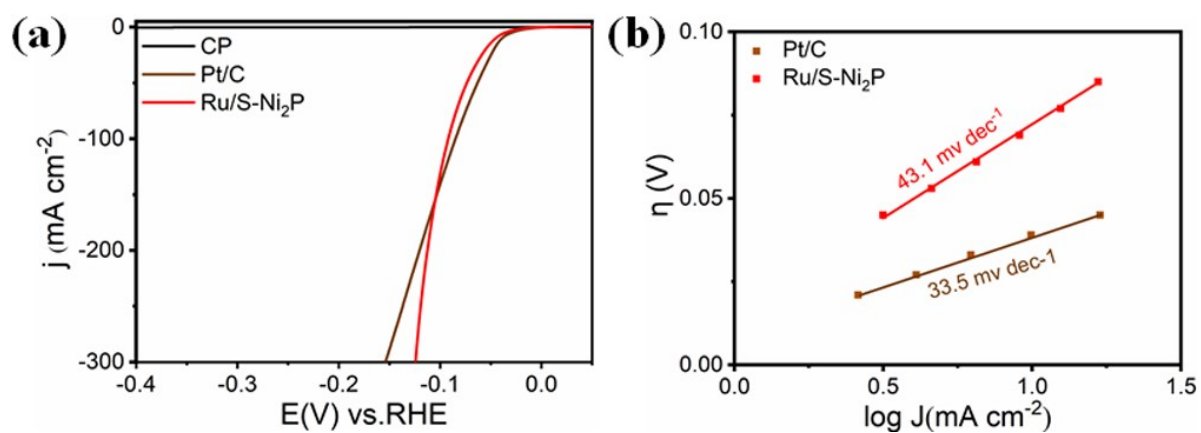

**Figure S8** (a) LSV curves of Pt/C and Ru/S-Ni<sub>2</sub>P in 1 M KOH. (b) The corresponding Tafel plots.

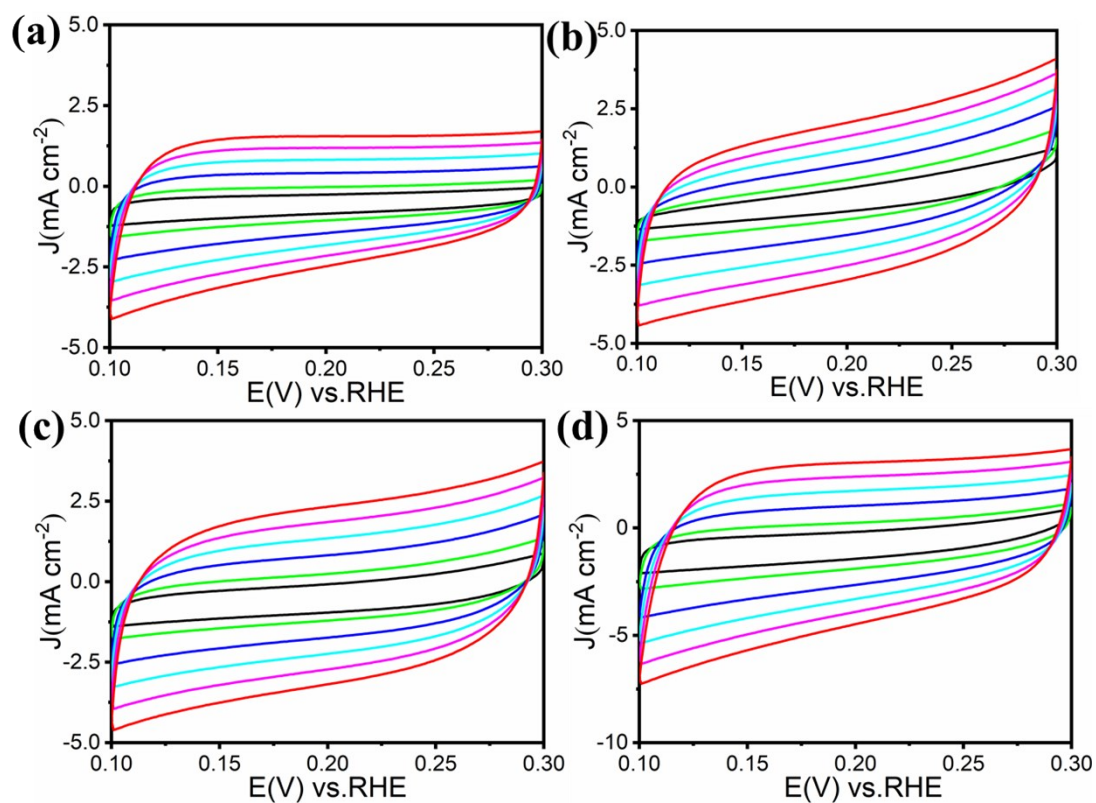

**Figure S9** CVs for Ni<sub>2</sub>P (a), S-Ni<sub>2</sub>P (b), Ru-Ni<sub>2</sub>P (c) and Ru/S-Ni<sub>2</sub>P (d).

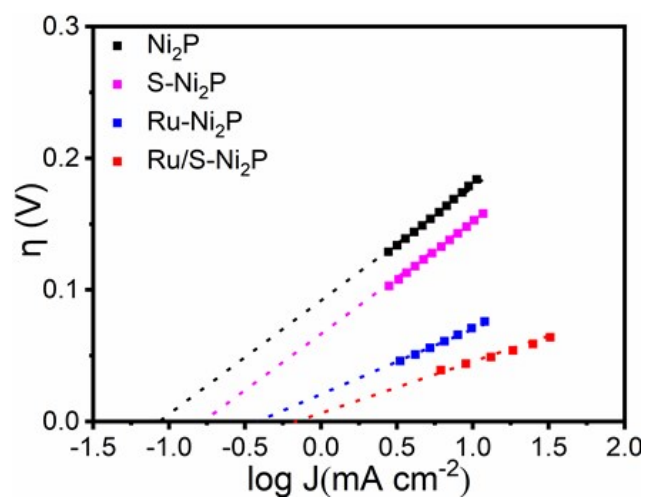

**Figure S10** Calculated exchange current density for Ni<sub>2</sub>P, S-Ni<sub>2</sub>P, Ru-Ni<sub>2</sub>P and Ru/S-Ni<sub>2</sub>P in 1 M KOH by applying extrapolation method to the Tafel plot.

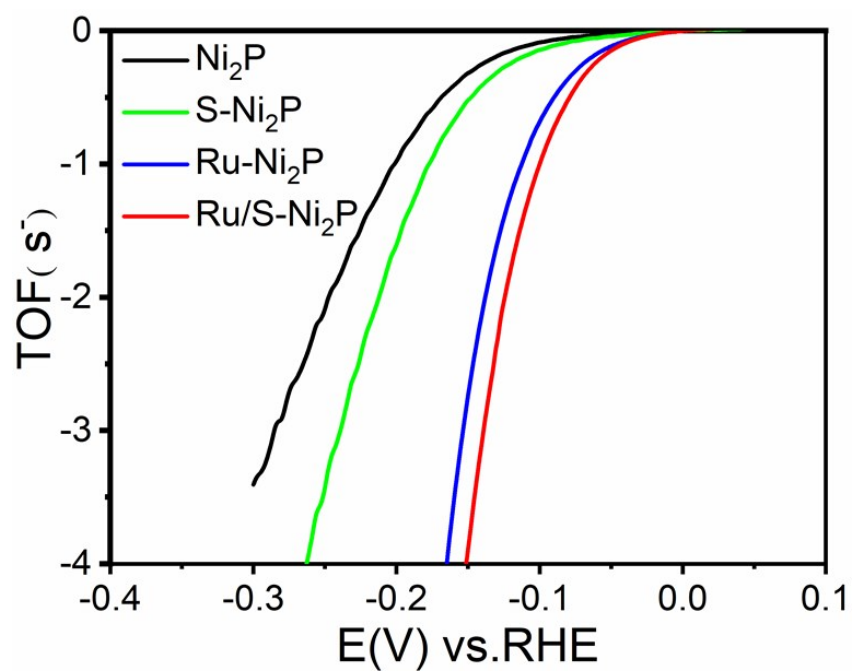

**Figure S11** Calculated TOF for Ni<sub>2</sub>P, S-Ni<sub>2</sub>P, Ru-Ni<sub>2</sub>P and Ru/S-Ni<sub>2</sub>P in 1 M KOH.

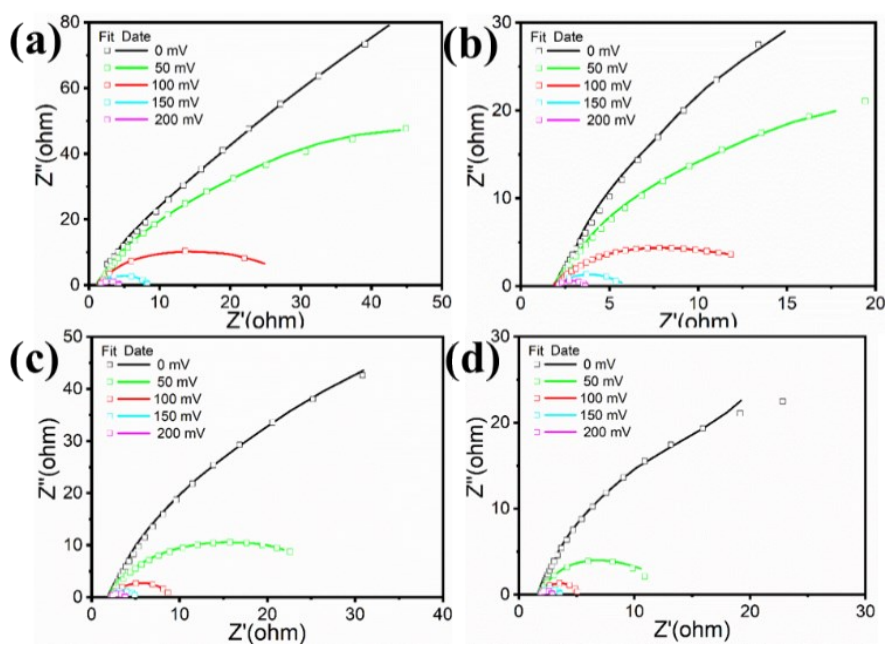

**Figure S12** Nyquist plots of Ni<sub>2</sub>P (a), S-Ni<sub>2</sub>P (b), Ru-Ni<sub>2</sub>P (c) and Ru/S-Ni<sub>2</sub>P (d) at different overpotential.



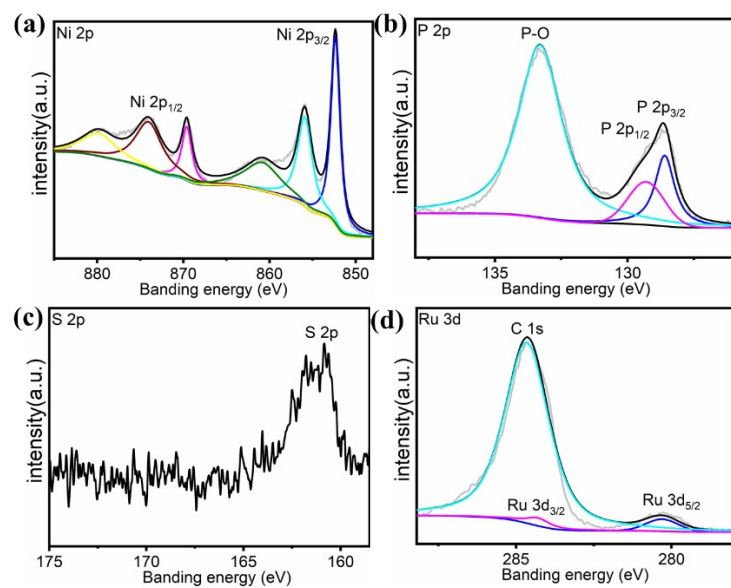

**Figure S13.** XPS spectra of (a) Ni 2p, (b) P 2p, (c) S 2p and (d) Ru 3d regions for Ru/S-Ni<sub>2</sub>P after HER hydrolysis.

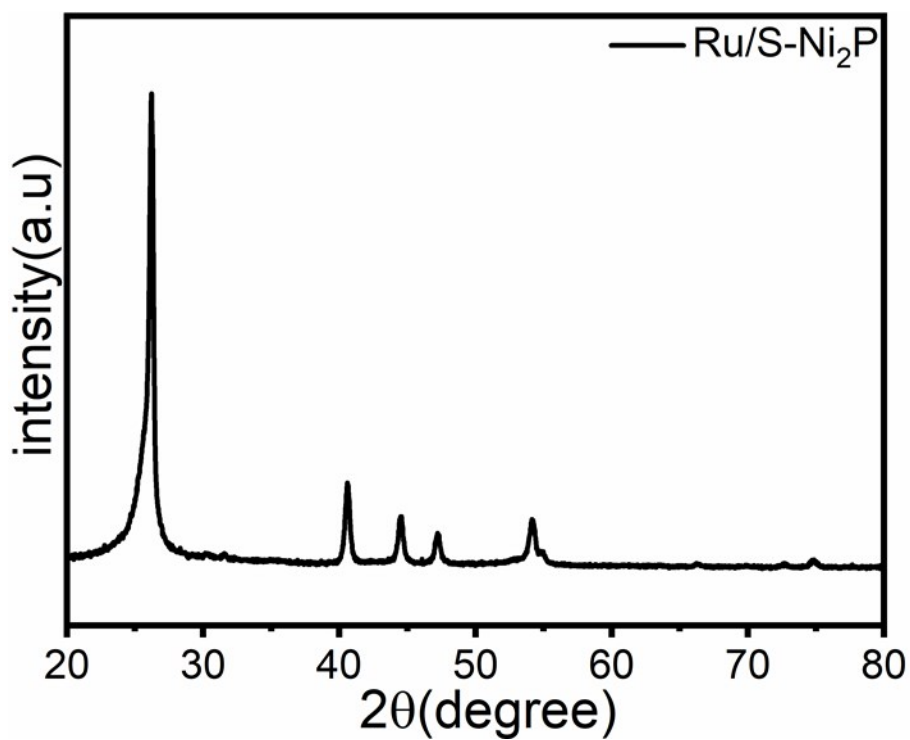

**Figure S14 (a)** XRD pattern for Ru/S-Ni<sub>2</sub>P after HER hydrolysis.

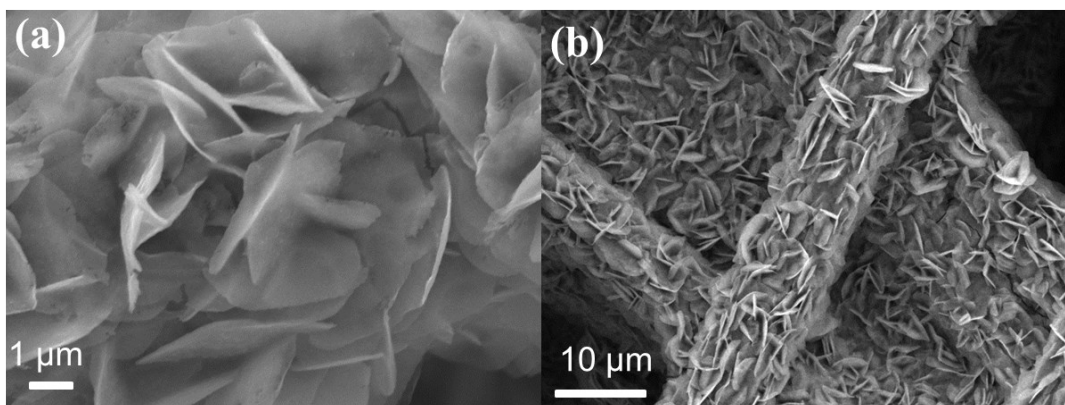

**Figure S15.** (a) SEM image of the Ru/S-Ni<sub>2</sub>P after electrolysis.

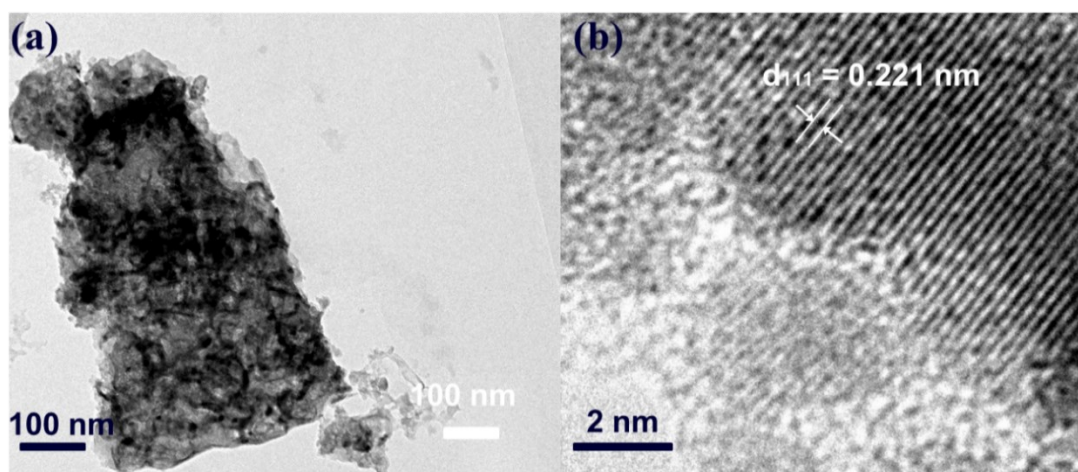

**Figure S16.** (a) TEM images and (b) lattice image of the Ru/S-Ni<sub>2</sub>P after electrolysis.

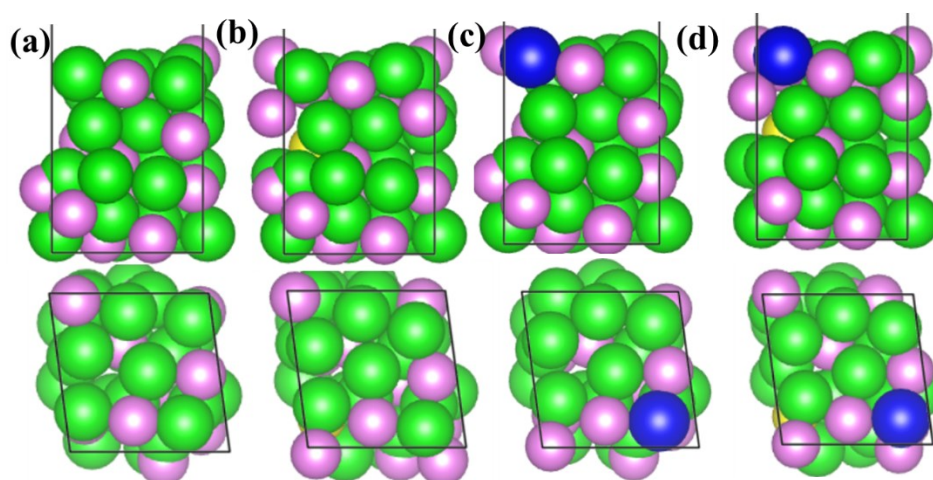

**Figure S17.** Top and side view of Ni<sub>2</sub>P (a), S-Ni<sub>2</sub>P (b), Ru-Ni<sub>2</sub>P (c) and Ru/S-Ni<sub>2</sub>P (d). Green, pink, yellow and blue balls represent Ni, P, S and Ru atoms, respectively.

**Table S1** Comparison of HER performance in alkaline media for Ru/S-Ni<sub>2</sub>P with other TMs HER electrocatalysts.

| Catalysts                                | J(mA cm <sup>-2</sup> ) | $\eta$ (mV vs RHE) | Tafel Slope (mV dec <sup>-1</sup> ) | Ref               |
|------------------------------------------|-------------------------|--------------------|-------------------------------------|-------------------|
| Ni <sub>2</sub> P /Ni                    | 10                      | 141                | 68                                  | S1 <sup>1</sup>   |
| Ni <sub>2</sub> P/Ti                     | 10                      | 120                | 60                                  | S2 <sup>2</sup>   |
| NiP <sub>2</sub> NS/CC                   | 10                      | 75                 | 51                                  | S3 <sup>3</sup>   |
| Ni <sub>2</sub> P NPs                    | 20                      | 130                | 81                                  | S4 <sup>4</sup>   |
| N-MoP/CC                                 | 10                      | 70                 | 55                                  | S5 <sup>5</sup>   |
| Mo-Ni <sub>2</sub> P                     | 10                      | 81                 | 53.4                                | S6 <sup>6</sup>   |
| Mn-CoP                                   | 10                      | 76                 | 52                                  | S7 <sup>7</sup>   |
| O, Cu-CoP                                | 10                      | 72                 | 62.6                                | S8 <sup>8</sup>   |
| Ni <sub>2</sub> P-NiSe <sub>2</sub>      | 10                      | 66                 | 72.6                                | S9 <sup>9</sup>   |
| S-MoP                                    | 10                      | 104                | 56                                  | S10 <sup>10</sup> |
| Ni <sub>3</sub> S <sub>2</sub> /NF       | 10                      | 149                | 127                                 | S11 <sup>11</sup> |
| N, Mn-MoS <sub>2</sub>                   | 10                      | 66                 | 50                                  | S12 <sup>12</sup> |
| P/Ni-Mo <sub>2</sub> C                   | 10                      | 165                | 53.6                                | S13 <sup>13</sup> |
| Ni <sub>1.5</sub> Co <sub>1.4</sub> P@Ru | 10                      | 52                 | 50                                  | S14 <sup>14</sup> |
| Ni@Ni <sub>2</sub> P-Ru                  | 10                      | 80                 | 41                                  | S15 <sup>15</sup> |
| S-Co <sub>2</sub> P@NCC                  | 10                      | 105                | 77                                  | S16 <sup>16</sup> |

|                                                     |                        |                        |             |                         |
|-----------------------------------------------------|------------------------|------------------------|-------------|-------------------------|
| <b>S,N-MoP</b>                                      | <b>10</b>              | <b>63</b>              | <b>44</b>   | <b>S17<sup>17</sup></b> |
| <b>FeP<sub>2</sub>/C</b>                            | <b>10</b>              | <b>~150</b>            | <b>66</b>   | <b>S18<sup>18</sup></b> |
| <b>Ni-P/Ni/NF</b>                                   | <b>10</b>              | <b>129</b>             | <b>70</b>   | <b>S19<sup>19</sup></b> |
| <b>Ni<sub>2</sub>P–Ni<sub>12</sub>P<sub>5</sub></b> | <b>10</b>              | <b>76</b>              | <b>68</b>   | <b>S20<sup>20</sup></b> |
| <b>Fe-Ni<sub>2</sub>P</b>                           | <b>10</b>              | <b>106</b>             | <b>37.7</b> | <b>S21<sup>21</sup></b> |
| <b>Ru/S-Ni<sub>2</sub>P</b>                         | <b>10</b><br><b>50</b> | <b>49</b><br><b>75</b> | <b>49.5</b> | <b>This work</b>        |

**Table S2.** Summary of the electrochemical properties of Ni<sub>2</sub>P, Ru-Ni<sub>2</sub>P, S-Ni<sub>2</sub>P and Ru/S-Ni<sub>2</sub>P. Note that the  $J_{0,\text{normalized}}$  is normalized by relative surface area ( $C_{dl}$ ).

| <b>Sample</b>               | <b><math>J_0</math><br/>(mA/cm<sup>2</sup>)</b> | <b><math>C_{dl}</math><br/>(mF/cm<sup>2</sup>)</b> | <b>Relative<br/>surface area</b> | <b><math>J_{0,\text{normalized}}</math><br/>(mA/cm<sup>2</sup>)</b> |
|-----------------------------|-------------------------------------------------|----------------------------------------------------|----------------------------------|---------------------------------------------------------------------|
| <b>Ni<sub>2</sub>P</b>      | <b>0.095x10<sup>-3</sup></b>                    | <b>19.2</b>                                        | <b>1</b>                         | <b>0.095x10<sup>-3</sup></b>                                        |
| <b>S-Ni<sub>2</sub>P</b>    | <b>0.178x10<sup>-3</sup></b>                    | <b>23.5</b>                                        | <b>1.2</b>                       | <b>0.148x10<sup>-3</sup></b>                                        |
| <b>Ru-Ni<sub>2</sub>P</b>   | <b>0.398x10<sup>-3</sup></b>                    | <b>25.8</b>                                        | <b>1.34</b>                      | <b>0.297x10<sup>-3</sup></b>                                        |
| <b>Ru/S-Ni<sub>2</sub>P</b> | <b>0.668x10<sup>-3</sup></b>                    | <b>34.6</b>                                        | <b>1.80</b>                      | <b>0.371x10<sup>-3</sup></b>                                        |

**Table S3** Summary of the  $R_{ct}$  values for Ni<sub>2</sub>P, Ru-Ni<sub>2</sub>P, S-Ni<sub>2</sub>P and Ru/S-Ni<sub>2</sub>P at certain overpotential from 0 mV to 200 mV.

| <b>Sample</b>            | <b>0 mV (<math>\Omega</math>)</b> | <b>50 mV<br/>(<math>\Omega</math>)</b> | <b>100 mV (<math>\Omega</math>)</b> | <b>150 mV (<math>\Omega</math>)</b> | <b>200 mV (<math>\Omega</math>)</b> |
|--------------------------|-----------------------------------|----------------------------------------|-------------------------------------|-------------------------------------|-------------------------------------|
| <b>Ni<sub>2</sub>P</b>   | <b>611.20</b>                     | <b>139.80</b>                          | <b>26.03</b>                        | <b>6.70</b>                         | <b>1.40</b>                         |
| <b>S-Ni<sub>2</sub>P</b> | <b>171.10</b>                     | <b>63.64</b>                           | <b>11.59</b>                        | <b>3.50</b>                         | <b>1.32</b>                         |

|                             |               |              |             |             |             |
|-----------------------------|---------------|--------------|-------------|-------------|-------------|
| <b>Ru-Ni<sub>2</sub>P</b>   | <b>146.70</b> | <b>27.07</b> | <b>6.79</b> | <b>2.85</b> | <b>1.05</b> |
| <b>Ru/S-Ni<sub>2</sub>P</b> | <b>60.64</b>  | <b>10.07</b> | <b>3.29</b> | <b>1.68</b> | <b>1.02</b> |

## References

- [1] Y. Shi, Y. Xu, S. Zhuo, J. Zhang, B. Zhang, *ACS Appl. Mater. Interfaces* **2015**, 7, 2376.
- [2] Z. Pu, Q. Liu, C. Tang, A. M. Asiri, X. Sun, *Nanoscale* **2014**, 6, 11031.
- [3] P. Jiang, Q. Liu, X. Sun, *Nanoscale* **2014**, 6, 13440.
- [4] E. J. Popczun, J. R. McKone, C. G. Read, A. J. Biacchi, A. M. Wiltrout, N. S. Lewis, R. E. Schaak, *J. Am. Chem. Soc.* **2013**, 135, 9267.
- [5] N. Chen, W. Zhang, J. Zeng, L. He, D. Li, Q. Gao, *Appl. Catal. B Environ.* **2020**, 268.
- [6] Q. Wang, H. Zhao, F. Li, W. She, X. Wang, L. Xu, H. Jiao, *J. Mater. Chem. A* **2019**, 7, 7636.
- [7] T. Liu, X. Ma, D. Liu, S. Hao, G. Du, Y. Ma, A. M. Asiri, X. Sun, L. Chen, *ACS Catal.* **2016**, 7, 98.
- [8] K. Xu, Y. Sun, Y. Sun, Y. Zhang, G. Jia, Q. Zhang, L. Gu, S. Li, Y. Li, H. J. Fan, *ACS Energy Lett.* **2018**, 3, 2750.
- [9] C. Liu, T. Gong, J. Zhang, X. Zheng, J. Mao, H. Liu, Y. Li, Q. Hao, *Appl. Catal. B Environ.* **2020**, 262.
- [10] K. Liang, S. Pakhira, Z. Yang, A. Nijamudheen, L. Ju, M. Wang, C. I. Aguirre-Velez, G. E. Sterbinsky, Y. Du, Z. Feng, J. L. Mendoza-Cortes, Y.

- Yang, *ACS Catal.* **2019**, *9*, 651.
- [11] W. He, L. Han, Q. Hao, X. Zheng, Y. Li, J. Zhang, C. Liu, H. Liu, H. L. Xin, *Acs Energy Lett.* **2019**, *4*, 2905.
- [12] T. Sun, J. Wang, X. Chi, Y. Lin, Z. Chen, X. Ling, C. Qiu, Y. Xu, L. Song, W. Chen, C. Su, *ACS Catal.* **2018**, *8*, 7585.
- [13] Z. Li, S. Xu, K. Chu, G. Yao, Y. Xu, P. Niu, Y. Yang, F. Zheng, *Inorg Chem* **2020**, *59*, 13741.
- [14] S. Liu, Q. Liu, Y. Lv, B. Chen, Q. Zhou, L. Wang, Q. Zheng, C. Che, C. Chen, *Chem. Commun.* **2017**, *53*, 13153.
- [15] Y. Liu, S. L. Liu, Y. Wang, Q. H. Zhang, L. Gu, S. C. Zhao, D. D. Xu, Y. F. Li, J. C. Bao, Z. H. Dai, *J. Am. Chem. Soc.* **2018**, *140*, 2731.
- [16] M. A. R. Anjum, M. D. Bhatt, M. H. Lee, J. S. Lee, *Chem Mater* **2018**, *30*, 8861-8870.
- [17] M. A. R. Anjum, J. S. Lee, *ACS Catal.* **2017**, *7*, 3030.
- [18] J. Jiang, C. Wang, J. Zhang, W. Wang, X. Zhou, B. Pan, K. Tang, J. Zuo, Q. Yang, *J. Mater. Chem. A* **2015**, *3*, 499.
- [19] J. Zhang, Z. Zhang, Y. Ji, J. Yang, K. Fan, X. Ma, C. Wang, R. Shu, Y. Chen, *Appl. Catal. B Environ.* **2021**, *282*, 119609.
- [20] Z. Wang, S. Wang, L. Ma, Y. Guo, J. Sun, N. Zhang, R. Jiang, *Small* **2021**, *17*, 2006770
- [21] M. Li, J. Wang, X. Guo, J. Li, Y. Huang, S. Geng, Y. Yu, Y. Liu, W. Yang, *Appl Surf Sci* **2021**, *536*, 147909.
